# Supplementary material for: Semaphorin 5A drives melanoma progression: role of Bcl-2, miR-204 and c-Myb
Source: Springer Nature journal article supplement (doi:10.1186/s13046-018-0933-x), 2018-11-19
Supplement: MOESM1 [file 16279898]

## TABLE S1

### Primer sequences used in ChIP analysis

| Promoter<br>(gene) | Foward                      | Reverse                     |
|--------------------|-----------------------------|-----------------------------|
| <b>Sema5A</b>      | 5'-CAGCGCTCTCCGCCCCGCGCT-3' | 5'-CGCTCGGGAGCGGGCTCAGG-3'  |
| <b>CCNB1</b>       | 5'-TGTGAGGCCAAGAGTTAAGA-3'  | 5'-ATCATAGCTCACTGTAACCTC-3' |
